# Supplementary material for: Does access to a colorectal cancer screening website and/or a nurse-managed telephone help line provided to patients by their family physician increase fecal occult blood test uptake?: A pragmatic cluster randomized controlled trial study protocol
Source: PubMed Central journal article supplement (PMC3495851; doi:10.1186/1471-2407-12-182), 2012-05-17
Supplement: 1471-2407-12-182-S10.pdf [file 1471-2407-12-182-S10.pdf]

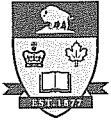

UNIVERSITY  
OF MANITOBA

## BANNATYNE CAMPUS Research Ethics Boards

P126-770 Bannatyne Avenue  
Winnipeg, Manitoba  
Canada R3E 0W3  
Tel: (204) 789-3255  
Fax: (204) 789-3414

### APPROVAL FORM

**Principal Investigator: Dr. A. Katz**

**Ethics Reference Number: H2009:312**

**Date of Approval: October 26, 2010**

**Date of Expiry: October 26, 2011**

**Protocol Title: CIHR/CancerCare Manitoba Team in Primary Care Oncology Research Three Research Protocol: Innovative Tools to Improve Colorectal Cancer Screening Rates in Manitoba (Linked to H2007:141)**

**The following is/are approved for use:**

- **Annual Approval**
- **Amendment outlined in letter dated September 28 and October 19, 2010**
- **Phone Script as per letter dated October 19, 2010**

The above was approved by Dr. John Arnett, Ph.D., C. Psych., Chair, Health Research Ethics Board, Bannatyne Campus, University of Manitoba on behalf of the committee per your submissions dated September 28 and October 19, 2010. The Research Ethics Board is organized and operates according to Health Canada/ICH Good Clinical Practices, Tri-Council Policy Statement, and the applicable laws and regulations of Manitoba. The membership of this Research Ethics Board complies with the membership requirements for Research Ethics Boards defined in Division 5 of the *Food and Drug Regulations of Canada*.

**This approval is valid until the expiry date only.** A study status report must be submitted annually and must accompany your request for re-approval. Any significant changes of the protocol and informed consent form should be reported to the Chair for consideration in advance of implementation of such changes. The REB must be notified regarding discontinuation or study closure.

This approval is for the ethics of human use only. For the logistics of performing the study, approval must be sought from the relevant institution, if required.

Sincerely yours,

John Arnett, Ph.D., C. Psych.  
Chair, Health Research Ethics Board  
Bannatyne Campus

**Please quote the above Ethics Reference Number on all correspondence.**

Inquiries should be directed to the REB Secretary **Telephone: (204) 789-3255 / Fax: (204) 789-3414**
